# Supplementary material
Source: PubMed Central journal article supplement (PMC8721777)

(a)

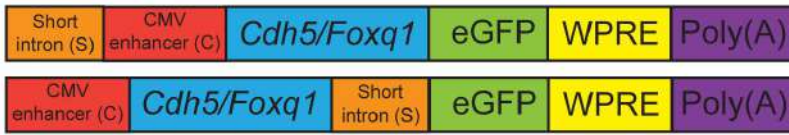

(b)

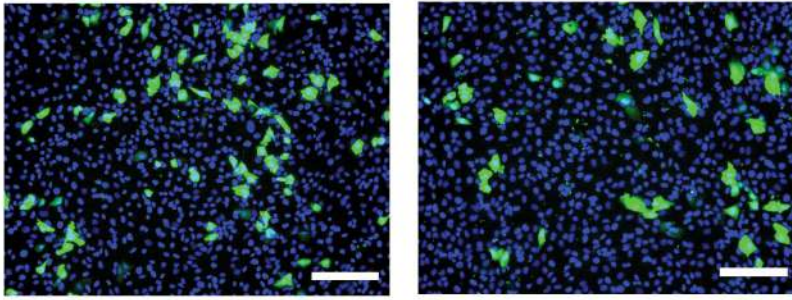S-C-*Cdh5*-eGFP-WC-*Cdh5*-S-eGFP-W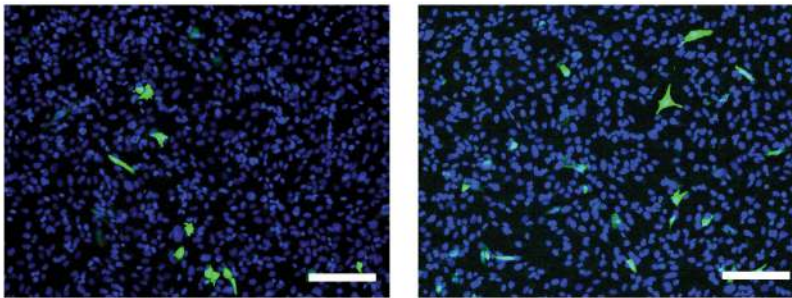S-C-*Foxq1*-eGFP-WC-*Foxq1*-S-eGFP-W

(c)

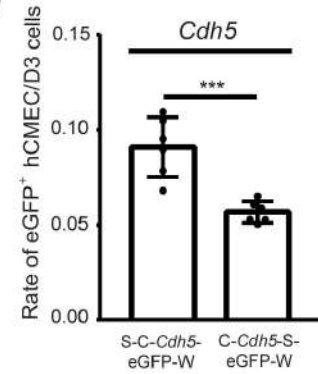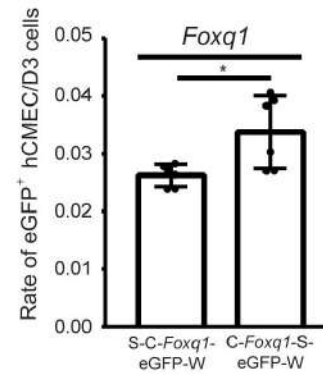

(d)

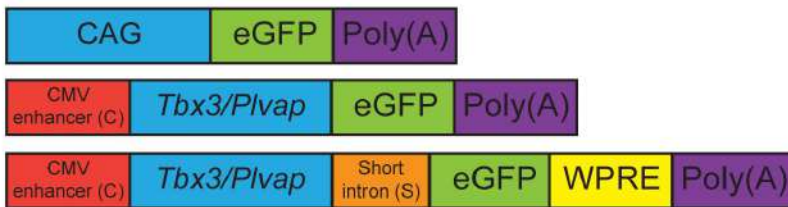

(e)

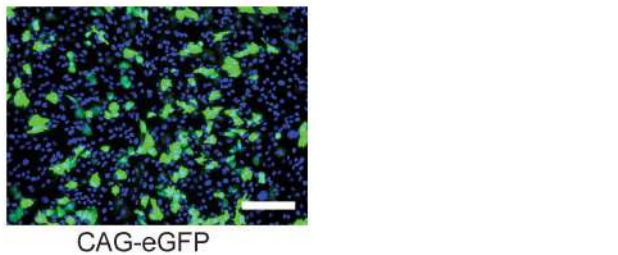

CAG-eGFP

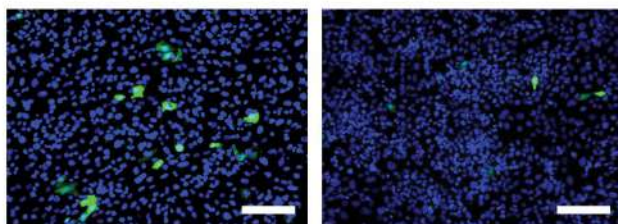C-*Tbx3*-eGFPC-*Tbx3*-S-eGFP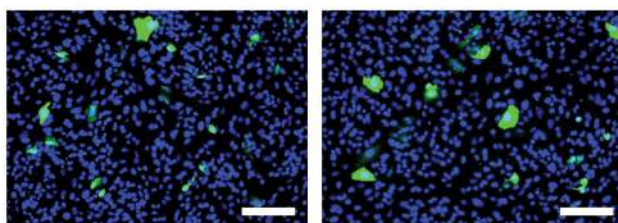C-*Plvap*-eGFPC-*Plvap*-S-eGFP

(f)

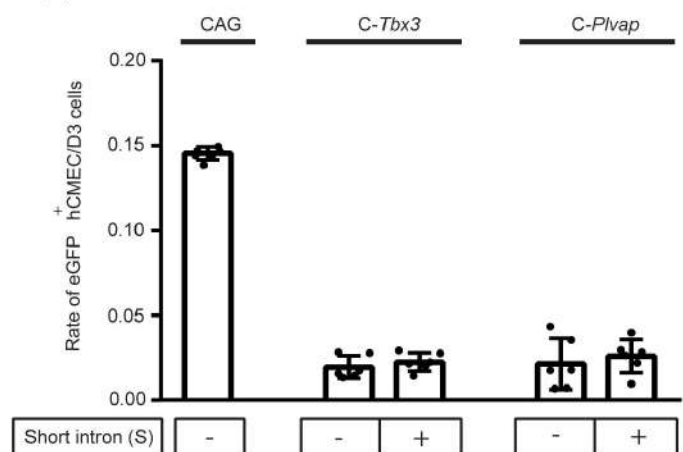

Supplementary Figure 1

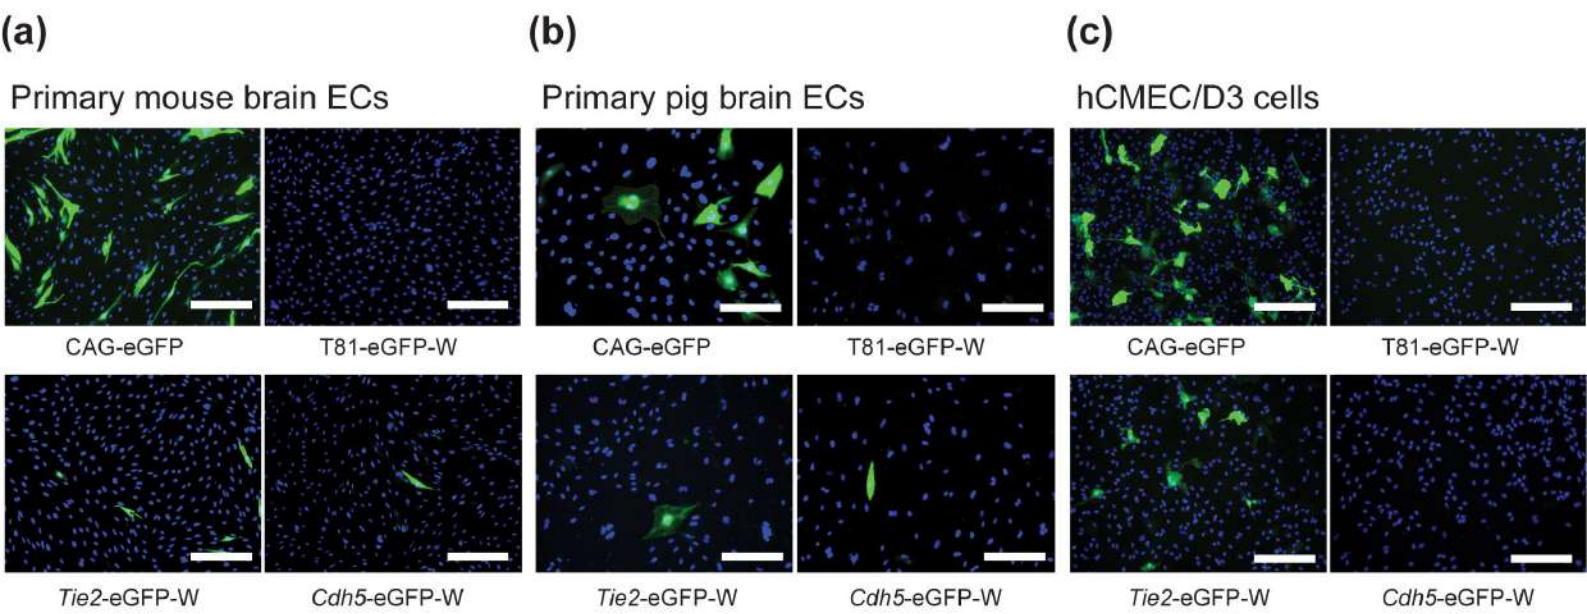

(a)

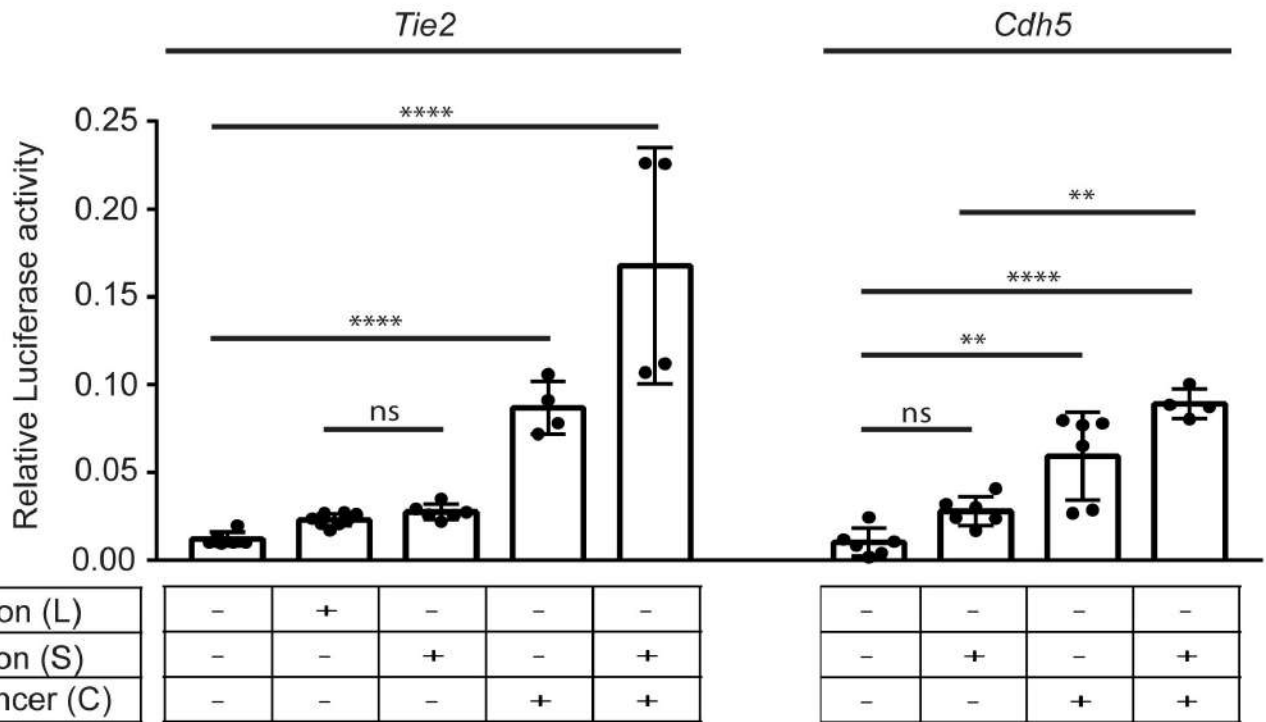

(b)

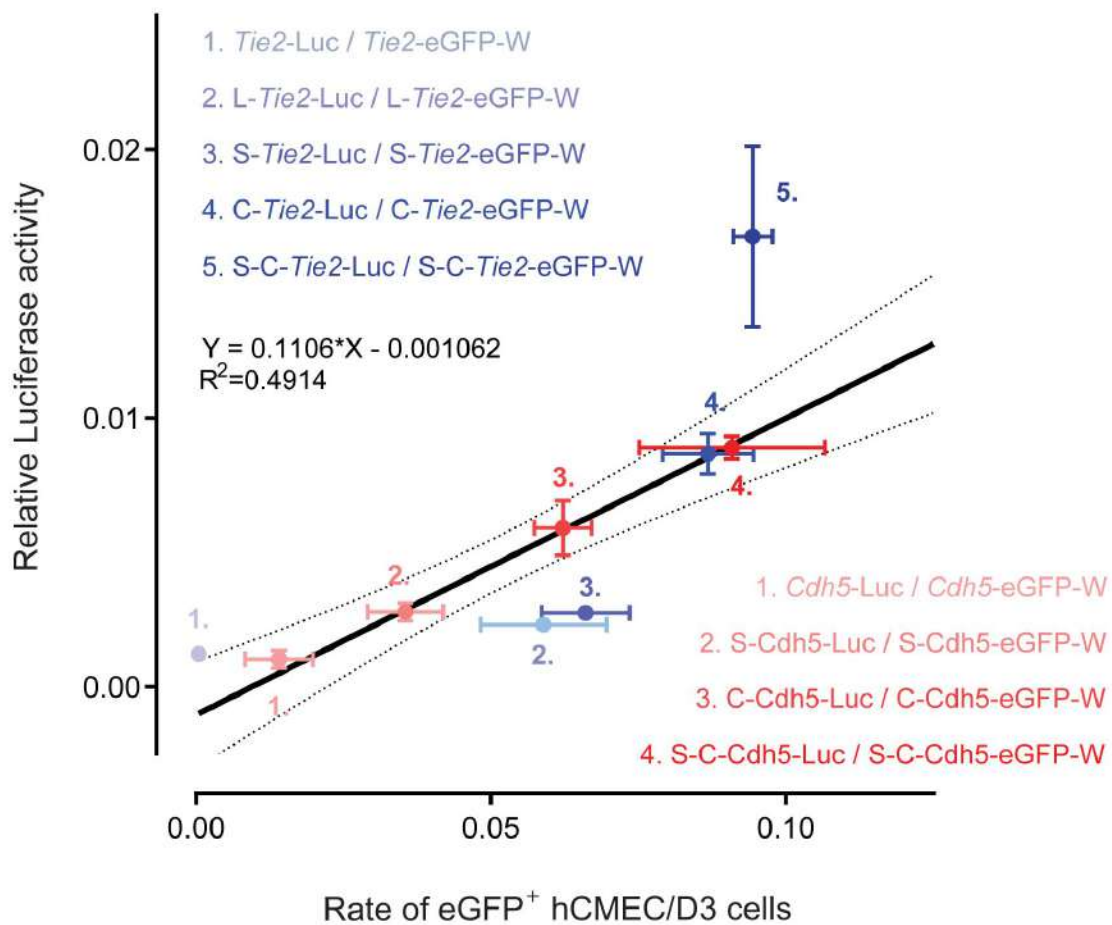



(a)

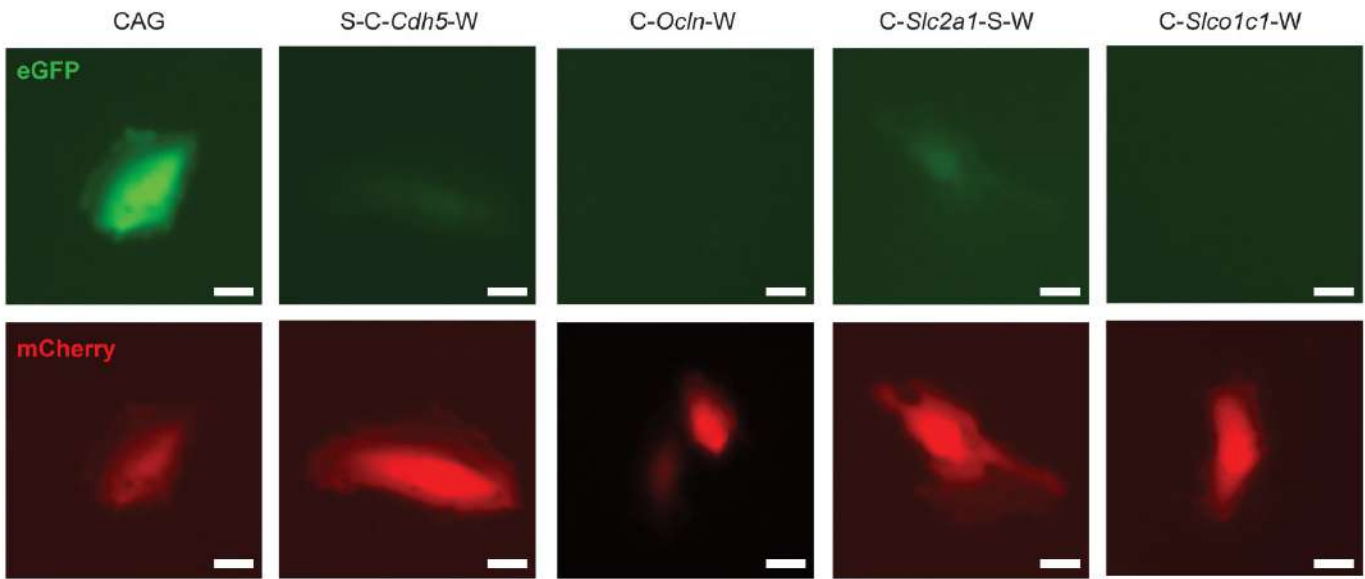

(b)

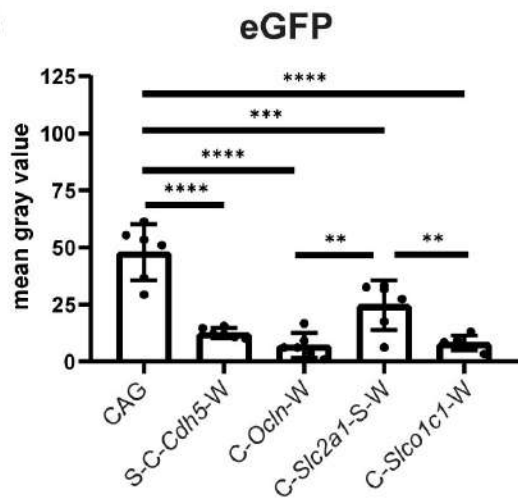

(c)

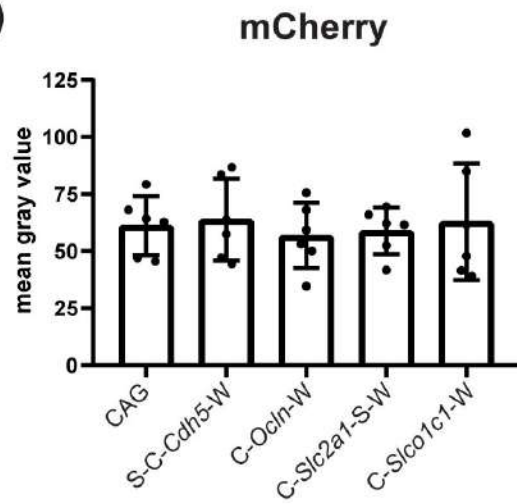

Supplement: sj-pdf-1-jcb-10.1177_0271678X211039617.pdf [file sj-pdf-1-jcb-10.1177_0271678X211039617.pdf]
